# Supplementary material
Source: ML conference proceedings conference paper supplement (https://proceedings.neurips.cc/paper_files/paper/2019/hash/cf040fc71060367913e81ac1eb050aea-Abstract.html)
Supplement: Supplementary file [file cf040fc71060367913e81ac1eb050aea-Supplemental.zip]

---

# - Supplementary Material -

## STAR-CAPS: Capsule Networks with Straight-Through Attentive Routing

---

**Karim Ahmed**  
Department of Computer Science  
Dartmouth College  
karim@cs.dartmouth.edu

**Lorenzo Torresani**  
Department of Computer Science  
Dartmouth College  
LT@dartmouth.edu

### A. Additional Experiments

**affnist dataset** We trained STAR-CAPS {32, 8, 16, 16, 10} on MNIST following the data augmentation as in EMCaps [2]. The test accuracy of STAR-CAPS on affNIST [1] is 93.03% vs. 93.1% for EMCaps {32, 32, 32, 32, 10}.

**Performance of STAR-CAPS vs. CNNs** Although the main purpose of STAR-CAPS is to alleviate the computational complexity of baseline capsule networks while being able to detect viewpoint variations, STAR-CAPS models achieve accuracies nearly on par with those modern CNN models. On CIFAR10, STAR-CAPS: 91.23%, #params=80K vs. ResNet20: 91.25%, #params=270K vs. ResNet110: 93.57%, #params=1.7M. On CIFAR100, STAR-CAPS: 67.66% vs. ResNet38: 68.54% vs. ResNet110: 71.21%. It is possible that scaling up STAR-CAPS models to match #params in ResNet, would lead to better performance.

**STAR-CAPS without ST-Router** Removing ST-Router leads to lower performance. On MNIST, STAR-CAPS model {32, 8, 16, 16, 10} achieves 99.41% without ST-Router and 99.59% with ST-Router; whereas STAR-CAPS {32, 4, 64, 4, 10} achieves 98.37% without ST-Router and 99.48% with ST-Router.

**Effect of sharing weights and role of attentions** We conducted experiments with two settings. First, STAR-CAPS with separate weights with attention modules. We didn't notice improvement on MNIST. On CIFAR10 {32, 8, 8, 8, 10} achieved 91.31% vs. 91.23%; however, the train/test time were significantly higher due to extra matrix multiplications as in EMCaps. Second, STAR-CAPS with separate weights without attentions; the experiments on MNIST/CIFAR10 showed poor performance. In conclusion, the proposed setting of STAR-CAPS provides best results in general, in terms of accuracy and train/test time while preserving capsule properties.

### B. Pseudo Code of STAR-CAPS

We provide a brief pseudo code for the forward propagation of a  $\text{ConvCaps}_\ell(k, n_\ell)$  layer in STAR-CAPS architecture, following the notation and the equations presented in Section 3 in the main paper.

---

**Algorithm 1** Forward pass of  $\text{ConvCaps}_\ell(k, n_\ell)$  layer in STAR-CAPS architecture.

---

**Input:** a set of the input pose matrices  $\mathbb{P}_{\ell-1} = \{\mathbf{P}_i \in \mathbb{R}^{p \times p} \mid i \in \{1, \dots, n_{\ell-1}\}\}$  generated by the lower-level capsules in layer  $\ell - 1$ .

**Output:** a set of output pose matrices  $\mathbb{P}_\ell = \{\tilde{\mathbf{P}}_j \in \mathbb{R}^{p \times p} \mid j \in \{1, \dots, n_\ell\}\}$  generated by the higher-level capsules defined in the current layer  $\ell$ .

1. Transform the **input pose**:

**for all** pose matrix  $\mathbf{P}_i \in \mathbb{R}^{p \times p}$  and transformation matrix  $\mathbf{W}_i \in \mathbb{R}^{p \times p}$  **do**  
 $\mathbf{V}_i^{pre} = \mathbf{P}_i \mathbf{W}_i \quad | \quad i \in \{1, \dots, n_{\ell-1}\}$   
**end for**

2. Estimate **attention matrices**  $\mathbf{A}_{ij} \in \mathbb{R}^{p \times p}$  using **Attention Estimators**  $\mathcal{T}_{ij}$ :

**for all** pre-votes  $\mathbf{V}_i^{pre} \in \mathbb{R}^{p \times p}$  **do**  
 $\mathbf{A}_{ij} \leftarrow \mathcal{T}_{ij}(\mathbf{V}_i^{pre}) \quad | \quad i \in \{1, \dots, n_{\ell-1}\}, j \in \{1, \dots, n_\ell\}$   
**end for**

3. Estimate **routing decisions**  $\delta_{ij} \in \{0, 1\}$  using **Straight-Through Routers**  $\mathcal{R}_{ij}$ :

**for all** attention matrices  $\mathbf{A}_{ij} \in \mathbb{R}^{p \times p}$  **do**  
 $\delta_{ij} \leftarrow \mathcal{R}_{ij}(\mathbf{A}_{ij}) \quad | \quad i \in \{1, \dots, n_{\ell-1}\}, j \in \{1, \dots, n_\ell\}$   
**end for**

4. Calculate the **output pose**:

**for all**  $\mathbf{A}_{ij}$  and  $\mathbf{V}_i^{pre}$  **do**  
 $\tilde{\mathbf{A}}_{ij} = \mathbf{A}_{ij} \odot \sum_{\substack{i=1 \\ \delta_{ij}=1}}^{n_{\ell-1}} \mathbf{A}_{ij} \quad | \quad i \in \{1, \dots, n_{\ell-1}\}, j \in \{1, \dots, n_\ell\}$   
 $\tilde{\mathbf{P}}_j = \sum_{\substack{i=1 \\ \delta_{ij}=1}}^{n_{\ell-1}} \mathbf{V}_i^{pre} \odot \tilde{\mathbf{A}}_{ij} \quad | \quad i \in \{1, \dots, n_{\ell-1}\}, j \in \{1, \dots, n_\ell\}$   
**end for**

---

## References

- [1] affnist dataset. <https://www.cs.toronto.edu/~tijmen/affNIST/>.
- [2] Geoffrey E Hinton, Sara Sabour, and Nicholas Frosst. Matrix capsules with em routing. *ICLR*, 2018.
